# Supplementary material for: Improving pharmacogenetic prediction of extrapyramidal symptoms induced by antipsychotics
Source: PubMed Central journal article supplement (PMC6293322; doi:10.1038/s41398-018-0330-4), 2018-12-13

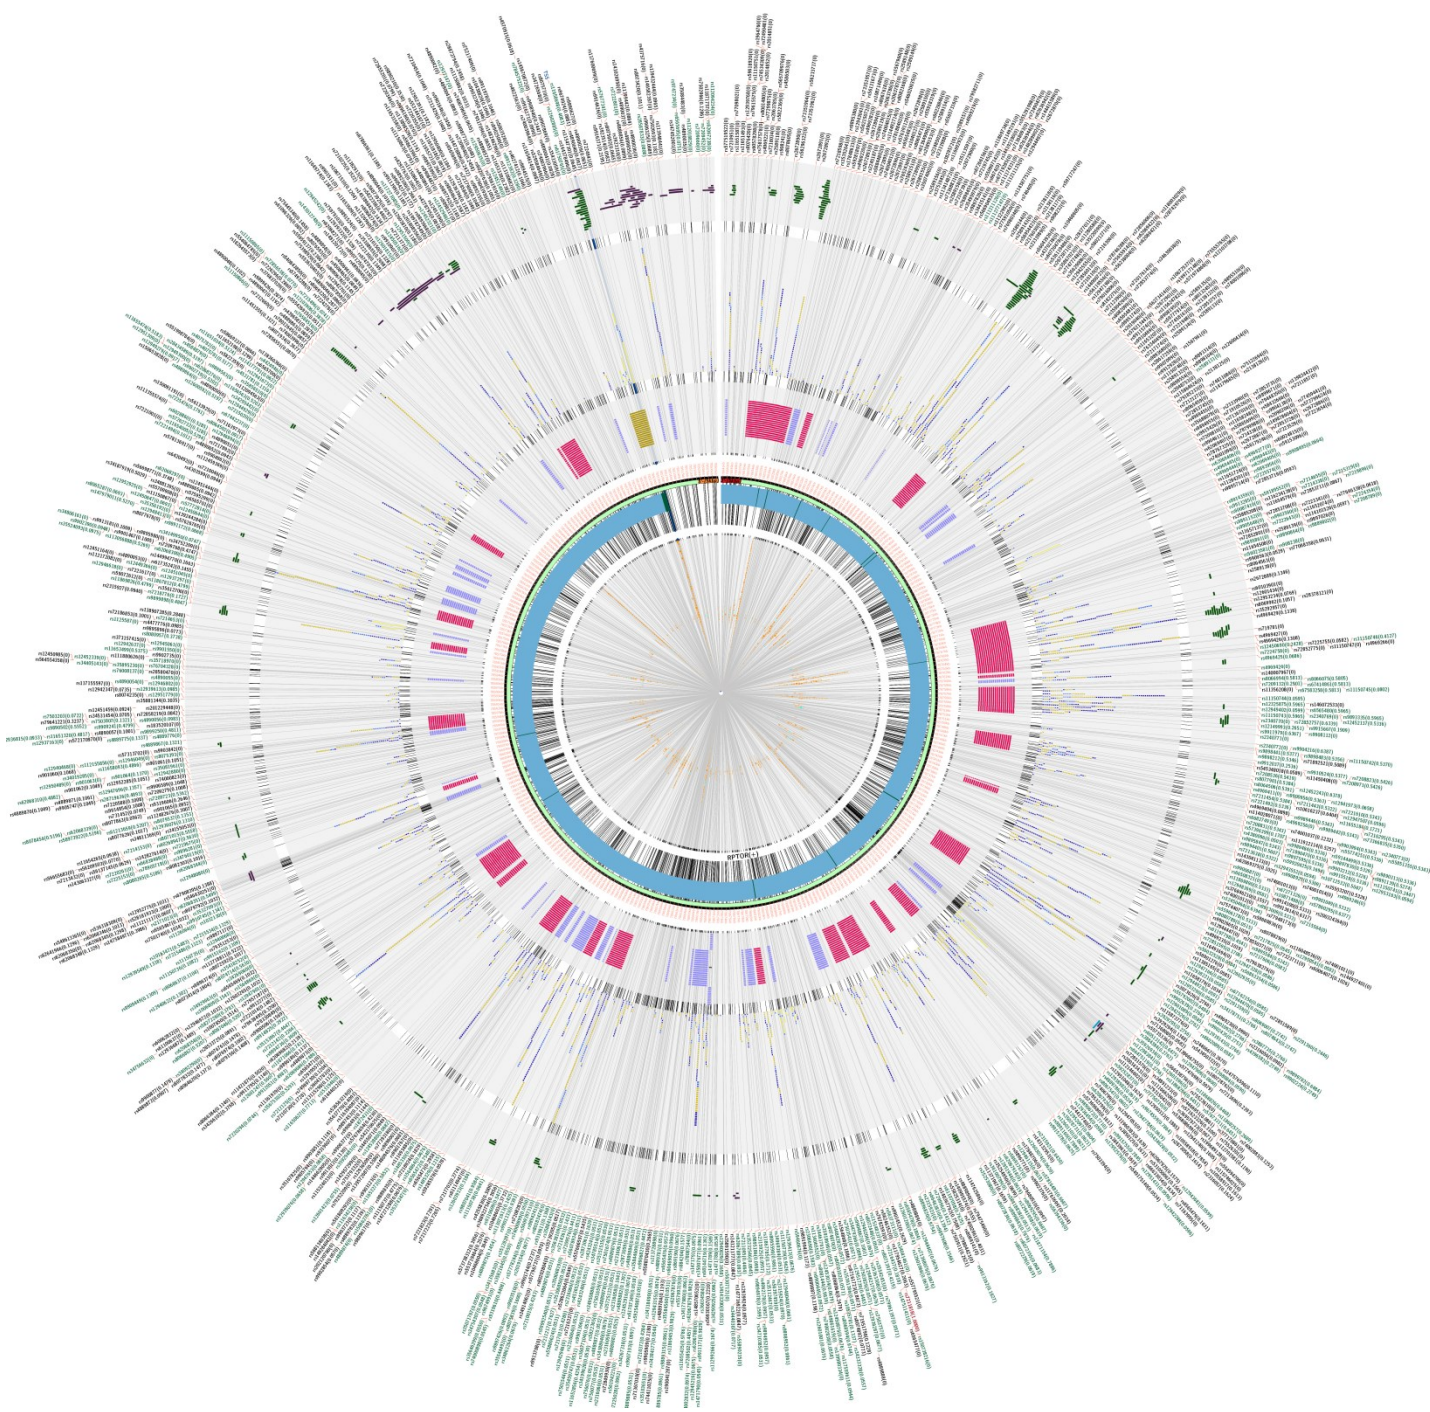

Supplement: 41398_2018_330_MOESM2_ESM.pdf [file 41398_2018_330_MOESM2_ESM.pdf]
